# Supplementary material for: The Unusual Metalloprotease-Rich Venom Proteome of the Australian Elapid Snake Hoplocephalus stephensii
Source: MDPI journal article supplement (doi:10.3390/toxins14050314), 2022-04-28
Supplement: s1 [file s1]

Supplementary Materials

# The Unusual Metalloprotease-Rich Venom Proteome of the Australian Elapid Snake *Hoplocephalus stephensii*

Theo Tasoulis <sup>1,\*</sup>, C. Ruth Wang <sup>2</sup>, Joanna Sumner <sup>3</sup>, Nathan Dunstan <sup>4</sup>, Tara L. Pukala <sup>2</sup> and Geoffrey K. Isbister <sup>1</sup>

<sup>1</sup> Clinical Toxicology Research Group Newcastle, University of Newcastle, Newcastle, NSW 2308, Australia; geoff.isbister@gmail.com

<sup>2</sup> Department of Chemistry, Faculty of Sciences, University of Adelaide, Adelaide, SA 5005, Australia; chia-de.wang@adelaide.edu.au (C.R.W.); tara.pukala@adelaide.edu.au (T.L.P.)

<sup>3</sup> Genetic Resources, Museums Victoria, Carlton Gardens, Melbourne, VIC 5053, Australia; jsumner@museum.vic.gov.au

<sup>4</sup> Venom Supplies, Tanunda, SA 5352, Australia; venoms@venomsupplies.com

\* Correspondence: theo.tasoulis@newcastle.edu.au

**Table S1.** Protein families detected by in-solution digestion of the whole venom. Asterisks indicate protein families not detected by venom fractionation and in-gel trypsin digestion.

|                      |
|----------------------|
| 3FTx                 |
| PLA2                 |
| SVSP                 |
| SVMP                 |
| CRISP                |
| CTL                  |
| LAAO                 |
| Natriuretic peptide* |
| NGF                  |
| 5'Nucleotidase*      |
| Glutamyl cyclase*    |
| Hyaluronidase*       |
| Phosphatase*         |
| Phospholipase B*     |
| Sulfhydryl oxidase*  |
| Waprin*              |
| Aminopeptidase*      |

|                                               |                                                                                                                       |                                                                                         |     |     |     |     |
|-----------------------------------------------|-----------------------------------------------------------------------------------------------------------------------|-----------------------------------------------------------------------------------------|-----|-----|-----|-----|
| LAO-elapitoxin-Hs1                            | 1                                                                                                                     | 11                                                                                      | 21  | 31  | 41  | 51  |
| LAO-elapitoxin-Hs1 (proteoform)               | MNV F I I F S L L F L A A L E S                                                                                       | C A D D R R R P L E E C F Q E A D Y E E F L E I A R N G L N E T S N P K H V V V V G A   |     |     |     |     |
| L-amino-acid oxidase ( <i>N. scutatus</i> )   | MNV F I I F S L L F L A A L E S                                                                                       | C A D D R R R P L E E C F Q E A D Y E E F L E I A R N G L N E T S N P K H V V V V G A   |     |     |     |     |
| L-amino-acid oxidase ( <i>P. australis</i> )  | MNV F F M F S L L F L A A L G S                                                                                       | C A D D R R R P L E E C F R E A D Y E E F L E I A K N G L K K R T S N P K R V V V V G A |     |     |     |     |
| L-amino-acid oxidase ( <i>B. fasciatus</i> )  | MNV F S I F S L V F L A A F G S                                                                                       | C A D D R R S A L E E C F R E A D Y E E F L E I A R N G L K K R T S N P K H V V V V G A |     |     |     |     |
| L-amino-acid oxidase ( <i>C. rhodostoma</i> ) | MNV F F M F S L L F L A A L G S                                                                                       | C A D D R R N P L A E C F Q E N D Y E E F L E I A R N G L K A T S N P K H V V I V G A   |     |     |     |     |
| LAO-elapitoxin-Hs1                            | 61                                                                                                                    | 71                                                                                      | 81  | 91  | 101 | 111 |
| LAO-elapitoxin-Hs1 (proteoform)               | GMA G L S A A Y V L A G A G H K V T L L E A S E R V G G R V N T Y R N E T E G W Y V N M G P M R L P E R H R I I R E Y |                                                                                         |     |     |     |     |
| L-amino-acid oxidase ( <i>N. scutatus</i> )   | GMA G L S A A Y V L A G A G H K V T L L E A S E R V G G R V N T Y R N E T E G W Y V N M G P M R L P E R H R I I R E Y |                                                                                         |     |     |     |     |
| L-amino-acid oxidase ( <i>P. australis</i> )  | GMA G L S A A Y V L A G A G H N V T L L E A S E R V G G R V N T Y R N E T E G W Y V N L G P M R L P E R H R I I R E Y |                                                                                         |     |     |     |     |
| L-amino-acid oxidase ( <i>B. fasciatus</i> )  | GMA G L S A A Y V L A G A G H Q V T L L E A S E R V G G R V N T Y R N E K D G W Y V N L G P M R L P E R H R I I R E Y |                                                                                         |     |     |     |     |
| L-amino-acid oxidase ( <i>C. rhodostoma</i> ) | GMA G L S A A Y V L A G A G H R V T L L E A S D R V G G R V N T Y R D E K E G W Y V N M G P M R L P E R H R I V R T Y |                                                                                         |     |     |     |     |
| LAO-elapitoxin-Hs1                            | 121                                                                                                                   | 131                                                                                     | 141 | 151 | 161 | 171 |
| LAO-elapitoxin-Hs1 (proteoform)               | IRK F G L E L N E F L Q E N E N A W Y F I K N I R K R V W E V K K D P G V F K Y P L N P S E E G K S A S Q L Y R E S L |                                                                                         |     |     |     |     |
| L-amino-acid oxidase ( <i>N. scutatus</i> )   | IRK F G L E L N E F L Q E N E N A W Y F I K N I R K R V W E V K K D P G V F K Y P L N P S E E G K S A S Q L Y R E S L |                                                                                         |     |     |     |     |
| L-amino-acid oxidase ( <i>P. australis</i> )  | IRK F G L K L N E F L Q E N E N A W Y F I R N I R K R V W E V K K D P G V F K Y P V E P S E E G K S A S Q L Y R E S L |                                                                                         |     |     |     |     |
| L-amino-acid oxidase ( <i>B. fasciatus</i> )  | IRK F G L E L N E F I Q E N D N A W Y F I K N I R K R V S E V K K D P G V F K Y P V K P S E E G K S A S Q L Y R E S L |                                                                                         |     |     |     |     |
| L-amino-acid oxidase ( <i>C. rhodostoma</i> ) | IRK F G L K L N E F F Q E N E N A W Y F I R N I R K R V W E V K K D P G V F K Y P V K P S E E G K S A S Q L Y R E S L |                                                                                         |     |     |     |     |
| LAO-elapitoxin-Hs1                            | 181                                                                                                                   | 191                                                                                     | 201 | 211 | 221 | 231 |
| LAO-elapitoxin-Hs1 (proteoform)               | KKV I E E L K R T S C S Y I L N K Y D T Y S T K E Y L I K E G N L S R G A V D M I G K L L N E D S S Y Y L S F I E S L |                                                                                         |     |     |     |     |
| L-amino-acid oxidase ( <i>N. scutatus</i> )   | KKV I E E L K R T S C S Y I L N K Y D T Y S T K E Y L I K E G N L S R G A V D M I G K L L N E D S S Y Y L S F I E S L |                                                                                         |     |     |     |     |
| L-amino-acid oxidase ( <i>P. australis</i> )  | EKV I E E L K R T N C S Y I L N K Y D T Y S T K E Y L I K E G N L S R G A V D M I G K L P N E D S S Y Y L S F I E S L |                                                                                         |     |     |     |     |
| L-amino-acid oxidase ( <i>B. fasciatus</i> )  | KKV I E E L K R T N C S Y I L N K Y D T Y S T K E Y L I K E G N L S P G A V D M I G D L L N E D S S Y Y L S F I E S L |                                                                                         |     |     |     |     |
| L-amino-acid oxidase ( <i>C. rhodostoma</i> ) | KKV I E E L K R T N C S Y I L D K Y D T Y S T K E Y L I K E G N L S R G A V D M I G D L L N E D S S Y Y L S F I E S L |                                                                                         |     |     |     |     |
| LAO-elapitoxin-Hs1                            | 241                                                                                                                   | 251                                                                                     | 261 | 271 | 281 | 291 |
| LAO-elapitoxin-Hs1 (proteoform)               | KSD D I F S Y E K R F D E I V G G F D Q L P I S M Y Q A I A E M V H L N A Q V I K I Q H N A E E V R V A Y Q T P A K T |                                                                                         |     |     |     |     |
| L-amino-acid oxidase ( <i>N. scutatus</i> )   | KSD D I F S Y E K R F D E I V G G F D Q L P I S M Y Q A I A E M V H L N A Q V I K I Q H N A E E V R V A Y Q T P A K T |                                                                                         |     |     |     |     |
| L-amino-acid oxidase ( <i>P. australis</i> )  | KSD D I F S Y E K R F D E I V G G F D Q L P R S M Y Q A I A E M V H L N A Q V I K I Q H N A E E V R V A Y Q T P A K T |                                                                                         |     |     |     |     |
| L-amino-acid oxidase ( <i>B. fasciatus</i> )  | KND D I F S Y E K R F D E I S D G F D Q L P K S M H Q A I A E M V H L N A Q V I K I Q R D A E K V R V A Y Q T P A K T |                                                                                         |     |     |     |     |
| L-amino-acid oxidase ( <i>C. rhodostoma</i> ) | KHD D I F A Y E K R F D E I V D G M D K L P T A M Y R D I Q D K V H F N A Q V I K I Q N D Q K V T V Y E T L S K E     |                                                                                         |     |     |     |     |
| LAO-elapitoxin-Hs1                            | 301                                                                                                                   | 311                                                                                     | 321 | 331 | 341 | 351 |
| LAO-elapitoxin-Hs1 (proteoform)               | LSY V T A D Y V I V C S T S R A T R R I Y F E P P L P P K K A H A L R S I H Y R S G T K I F L T C T R K F W E A D G I |                                                                                         |     |     |     |     |
| L-amino-acid oxidase ( <i>N. scutatus</i> )   | LSY V T A D Y V I V C S T S R A T R R I Y F E P P L P P K K A H A L R S I H Y R S A T K I F L T C T K F W E D D G I   |                                                                                         |     |     |     |     |
| L-amino-acid oxidase ( <i>P. australis</i> )  | LSY V T A D Y V I V C S T S R A A R R I Y F E P P L P P K K A H A L R S I H Y R S G T K I F L T C T R K F W E A D G I |                                                                                         |     |     |     |     |
| L-amino-acid oxidase ( <i>B. fasciatus</i> )  | LSY V I A D Y V I V C S T S R A A R R I H F E P P L P P K K A H A L R S I H Y R S T K I F L T C S Q K F W E A D G I   |                                                                                         |     |     |     |     |
| L-amino-acid oxidase ( <i>C. rhodostoma</i> ) | LSY V T A D Y V I V C A T S R A V R R I S F E P P L P P K K A H A L R S I H Y K S A T K I F L T C T R K F W E A D G I |                                                                                         |     |     |     |     |
| LAO-elapitoxin-Hs1                            | 361                                                                                                                   | 371                                                                                     | 381 | 391 | 401 | 411 |
| LAO-elapitoxin-Hs1 (proteoform)               | TPS V T A D Y V I V C T T S R A V R L I K F N P P L L P K K A H A L R S V H Y R S G T K I F L T C T T K F W E D D G I |                                                                                         |     |     |     |     |
| L-amino-acid oxidase ( <i>N. scutatus</i> )   | HGG K S T T D L P S R F I Y Y P N H N F T S G I G V I V A Y T L A D D A D F F Q A L D I K T S A D I V I N D L S L I H |                                                                                         |     |     |     |     |
| L-amino-acid oxidase ( <i>P. australis</i> )  | HGG K S T T D L P S R F I Y Y P N H N F T S G I G V I V A Y T L A D D A D F F Q A L D I K T S A D I V I N D L S L I H |                                                                                         |     |     |     |     |
| L-amino-acid oxidase ( <i>B. fasciatus</i> )  | HGG K S T T D L P S R F I Y Y P N H N F T S G I G V I V A Y T L A D D T D F F Q A L D I E T S A D I V I N D L S L I H |                                                                                         |     |     |     |     |
| L-amino-acid oxidase ( <i>C. rhodostoma</i> ) | HGG K S T T D L P S R F I Y Y P N H N F T S G V G V I V A Y V L A D D S D F F Q A L D I K T S A D I V I N D L S L I H |                                                                                         |     |     |     |     |
| LAO-elapitoxin-Hs1                            | 421                                                                                                                   | 431                                                                                     | 441 | 451 | 461 | 471 |
| LAO-elapitoxin-Hs1 (proteoform)               | QLP K E E I Q A L C Y P S M I Q K W S L D K Y A M G A I T S F T P Y Q F Q D F I E T V A A P V G R I Y F A G E Y T A S |                                                                                         |     |     |     |     |
| L-amino-acid oxidase ( <i>N. scutatus</i> )   | QLP K E E I Q A L C Y P S M I Q K W S L D K Y A M G A I T S F T P Y Q F Q D F I E T V A A P V G R I Y F A G E Y T A S |                                                                                         |     |     |     |     |
| L-amino-acid oxidase ( <i>P. australis</i> )  | QLP K E E I Q A L C Y P S M I K K W S L D K Y A M G A I T S F T P Y Q F Q D F I E T V A A P V G R I Y F A G E Y T A R |                                                                                         |     |     |     |     |
| L-amino-acid oxidase ( <i>B. fasciatus</i> )  | QLP K E Q I Q A L C Y P S K I Q K W S L D E Y A M G A I T S F T P Y Q F Q D F E I V A A P V G R I Y F A G E Y T A S   |                                                                                         |     |     |     |     |
| L-amino-acid oxidase ( <i>C. rhodostoma</i> ) | QLP K N E I Q A L C Y P S L I K K W S L D K Y T M G A L T S F T P Y Q F Q D Y I E T V A A P V G R I Y F A G E Y T A T |                                                                                         |     |     |     |     |
| LAO-elapitoxin-Hs1                            | 481                                                                                                                   | 491                                                                                     | 501 | 511 |     |     |
| LAO-elapitoxin-Hs1 (proteoform)               | VHGW L D N T I K S G L T A A R D V N R A S Q K P S R I Q L I S D N Q L                                                |                                                                                         |     |     |     |     |
| L-amino-acid oxidase ( <i>N. scutatus</i> )   | VHGW L D N T I K S G L T A A R D V N R A S Q K P S R I Q L I S D N Q L                                                |                                                                                         |     |     |     |     |
| L-amino-acid oxidase ( <i>P. australis</i> )  | VHGW L D S T I K S G L T A A R D V N R A S Q K P S R R Q L S N D N E L                                                |                                                                                         |     |     |     |     |
| L-amino-acid oxidase ( <i>B. fasciatus</i> )  | VHGW L D S T I K S G L T A A R D V N L A S Q K P S R I Q L S N D N E L                                                |                                                                                         |     |     |     |     |
| L-amino-acid oxidase ( <i>C. rhodostoma</i> ) | VHGW L D S T I K S G L T A A R N V N R A S Q K P S R I H L I N D N Q L                                                |                                                                                         |     |     |     |     |
|                                               | AHGW I D S T I K S G L R A A R D V N L A S E N P S G I H L S N D N E L                                                |                                                                                         |     |     |     |     |

**Figure S1.** Deduced amino acid sequences for a new LAO toxin (LAO-elapitoxin-Hs1; row 1) and a proteoform of this differing by four residues (yellow shaded; row 2) found in *H. stephensii* venom compared to the previously identified L-amino-acid-oxidases in *N. scutatus* venom (Q4JHE2; row 3), *P. australis* venom (Q4JHE1; row 4), *B. fasciatus* (A8QL52; row 5) and *Calloselasma rhodostoma* (P81382; row 6). The signal sequence is shaded orange, conserved cysteine residues are shaded in blue and shaded grey areas indicate the same residue compared to LAO-elapitoxin-Hs1.

|                |                                                                                                                         |     |     |     |     |     |
|----------------|-------------------------------------------------------------------------------------------------------------------------|-----|-----|-----|-----|-----|
|                | 1                                                                                                                       | 11  | 21  | 31  | 41  | 51  |
| Hopsarin       | MAPQ L L L C L I L T F L W S V P E A E S N V F L K S K V A N R F L Q R T K R S N S L F E E I R P G N I E R E C I E E    |     |     |     |     |     |
| Shannon_62829  | MAHQ L L L C L I L T F L W S V P E A E S N V F L K S K V A N R F L Q R T K R S N S L F E E I R P G N I E R E C I E E    |     |     |     |     |     |
| Shannon_117774 |                                                                                                                         |     |     |     |     |     |
| Shannon_195406 | MAHQ L L L C L I L T F L W S V P E A E S N V F L K S K V A N R F L Q R T K R S N S L F E E I R P G N I E R E C I E E    |     |     |     |     |     |
| Shannon_80160  | MAHQ L L L C L I L T F L W S V P E A E S N V F L K S K V A N R F L Q R T K R S N S L F E E I R P G N I E R E C I E E    |     |     |     |     |     |
| Shannon_25096  | MAHQ L L L C L I L T F L W S V P E A E S N V F L K S K V A N R F L Q R T K R S N S L F E E I R P G N I E R E C I E E    |     |     |     |     |     |
| Shannon_44872  |                                                                                                                         |     |     |     |     |     |
| Shannon_147785 |                                                                                                                         |     |     |     |     |     |
|                | 61                                                                                                                      | 71  | 81  | 91  | 101 | 111 |
| Hopsarin       | K C S K E E A R E V F E D N E K T E T F W N V Y V D G D Q C S S N P C H Y H G T C K D G I G S Y T C T C L P N Y E G K N |     |     |     |     |     |
| Shannon_62829  | K C S K E E A R E A F E D N E K T E T F W N V Y V D G D Q C S S N P C H Y H G T C K D G I G S Y T C T C L P N Y E G K N |     |     |     |     |     |
| Shannon_117774 |                                                                                                                         |     |     |     |     |     |
| Shannon_195406 | K C S K E E A R E A F E D N E K T E T F W N V Y V D G D Q C S S N P C H Y H G T C K D G I G S Y T C T C L P N Y E G K N |     |     |     |     |     |
| Shannon_80160  | K C S K E E A R E A F E D N E K T E T F W N V Y V D G D Q C S S N P C H Y H G T C K D G I G S Y T C T C L P N Y E G K N |     |     |     |     |     |
| Shannon_25096  | K C S K E E A R E A F E D N E K T E T F W N V Y V D G D Q C S S N P C H Y H G T C K D G I G S Y T C T C L P N Y E G K N |     |     |     |     |     |
| Shannon_44872  |                                                                                                                         |     |     |     |     |     |
| Shannon_147785 |                                                                                                                         |     |     |     |     |     |
|                | 121                                                                                                                     | 131 | 141 | 151 | 161 | 171 |
| Hopsarin       | C E K V L F K S C R A F N G N C W H F C K R V Q S E T Q C S C A E S Y R L G V D G H S C V A E G D F S C G R N I K A R N |     |     |     |     |     |
| Shannon_62829  | C E K V L F K S C R A F N G N C W H F C K R V Q S E T Q C S C A E S Y R L G V D G H S C V A E G D F S C G R N I K A R N |     |     |     |     |     |
| Shannon_117774 |                                                                                                                         |     |     |     |     |     |
| Shannon_195406 | C E K V L F K S C R A F N G N C W H F C K R V Q S E T Q C S C A E S Y R L G V D G H S C V A E G D F S C G R N I K A R N |     |     |     |     |     |
| Shannon_80160  | C E K V L F K S C R A F N G N C W H F C K R V Q S E T Q C S C A E S Y R L G V D G H S C V A E G D F S C G R N I K A R N |     |     |     |     |     |
| Shannon_25096  | C E K V L F K S C R A F N G N C W H F C K R V Q S E T Q C S C A E S Y R L G V D G H S C V A E G D F S C G R N I K A R N |     |     |     |     |     |
| Shannon_44872  |                                                                                                                         |     |     |     |     |     |
| Shannon_147785 |                                                                                                                         |     |     |     |     |     |
|                | 181                                                                                                                     | 191 | 201 | 211 | 221 | 231 |
| Hopsarin       | K R E A S L P D F V Q S Q K A T L L K K S D N P S P D I R I V N G M D S K L G E C P W Q A V L I N E K G E V F C G G T I |     |     |     |     |     |
| Shannon_62829  | K R E A S L P D F V Q S Q K A T L L K K S D N P S P D I R I V N G M D S K L G E C P W Q A V L I N E K G E V F C G G T I |     |     |     |     |     |
| Shannon_117774 |                                                                                                                         |     |     |     |     |     |
| Shannon_195406 | K R E A S L P D F V Q S Q K A T L L K K S D N P S P D I R I V N G M D S K L G E C P W Q A V L I N E K G E V F C G G T I |     |     |     |     |     |
| Shannon_80160  | K R E A S L P D F V Q S Q K A T L L K K S D N P S P D I R I V N G M D S K L G E C P W Q A V L I N E K G E V F C G G T I |     |     |     |     |     |
| Shannon_25096  | K R E A S L P D F V Q S Q K A T L L K K S D N P S P D I R I V N G M D S K L G E C P W Q A V L I N E K G E V F C G G T I |     |     |     |     |     |
| Shannon_44872  |                                                                                                                         |     |     |     |     |     |
| Shannon_147785 |                                                                                                                         |     |     |     |     |     |
|                | 241                                                                                                                     | 251 | 261 | 271 | 281 | 291 |
| Hopsarin       | L S P I H V L T A A H C I N Q T K S V S V I V G E I D I S R K E T R R L L S V D K I Y V H T K F V P P N Y Y Y G H Q N F |     |     |     |     |     |
| Shannon_62829  | L S P I H V L T A A H C I N Q T K S V S V I V G E I D I S R K E T R R L L S V D K I Y V H T K F V P P N Y Y Y G H Q N F |     |     |     |     |     |
| Shannon_117774 |                                                                                                                         |     |     |     |     |     |
| Shannon_195406 | L S P I H V L T A A H C I N Q T K S V S V I V G E I D I S R K E T R R L L S V D K I Y V H T K F V P P N Y Y Y G H Q N F |     |     |     |     |     |
| Shannon_80160  | L S P I H V L T A A R S E E R R V G K E C R S R W S                                                                     |     |     |     |     |     |
| Shannon_25096  | L S P I H V L T A A H C I N Q T K S V S V I V G E I D I S R K E T R R L L S V D K I Y V R S E E R R V G K E C R S R W S |     |     |     |     |     |
| Shannon_44872  |                                                                                                                         |     |     |     |     |     |
| Shannon_147785 | L S P I H V L T A A H C I N Q T K S V S V I V G E I D I S R K E T R R L L S V D K I Y V H T K F V P P N Y Y Y G H Q N F |     |     |     |     |     |
|                | 301                                                                                                                     | 311 | 321 | 331 | 341 | 351 |
| Hopsarin       | D R V A Y D Y D I A I I R M K T P I Q F S E N V V P A C L P T A D F A N E V L M K Q D S G I V S G F G R I R F K E P T S |     |     |     |     |     |
| Shannon_62829  | D R V A Y D Y D I A I I R M K T P I Q F S E N V V P A C L P T A D F A N E V L M K Q D S G I V S G F G R I R F K E P T S |     |     |     |     |     |
| Shannon_117774 |                                                                                                                         |     |     |     |     |     |
| Shannon_195406 | D R V A Y D Y D I A I I R M K T P I Q F S E N V V P A C L P T A D F A N E V L M K Q D S G I V S G F G R I R F K E P T S |     |     |     |     |     |
| Shannon_80160  | D R V A Y D Y D I A I I R M K T P I Q F S E N V V P A C L P T A D F A N E V Q I G R A S C R E R V                       |     |     |     |     |     |
| Shannon_25096  |                                                                                                                         |     |     |     |     |     |
| Shannon_44872  |                                                                                                                         |     |     |     |     |     |
| Shannon_147785 |                                                                                                                         |     |     |     |     |     |
|                | 361                                                                                                                     | 371 | 381 | 391 | 401 | 411 |
| Hopsarin       | N T L K V I T V P Y V D R H T C M L S S D F R I T Q N M F C A G Y D T L P Q D A C E G D S G G P H I T A Y G D T H F I T |     |     |     |     |     |
| Shannon_62829  | N T L K V I T V P Y V D R H T C M L S S D F R I T Q N M F C A G Y D T L P Q D A C E G D S G G P H I T A Y G D T H F I T |     |     |     |     |     |
| Shannon_117774 |                                                                                                                         |     |     |     |     |     |
| Shannon_195406 | N T L K V I T V P Y V D R H T C M L S S D F R I T Q N M F C A G Y D T L P Q D A C E G D S G G P H I T A Y G D T H F I T |     |     |     |     |     |
| Shannon_80160  |                                                                                                                         |     |     |     |     |     |
| Shannon_25096  |                                                                                                                         |     |     |     |     |     |
| Shannon_44872  |                                                                                                                         |     |     |     |     |     |
| Shannon_147785 |                                                                                                                         |     |     |     |     |     |
|                | 421                                                                                                                     | 431 | 441 | 451 |     |     |
| Hopsarin       | G I V S W G E G C A R K G K Y G V Y T K V S R F I P W I K K I M S L K                                                   |     |     |     |     |     |
| Shannon_62829  | G I V S W G E G C A R K G K Y G V Y T K V S R F I P W I K K I M S L K                                                   |     |     |     |     |     |
| Shannon_117774 |                                                                                                                         |     |     |     |     |     |
| Shannon_195406 |                                                                                                                         |     |     |     |     |     |
| Shannon_80160  |                                                                                                                         |     |     |     |     |     |
| Shannon_25096  |                                                                                                                         |     |     |     |     |     |
| Shannon_44872  |                                                                                                                         |     |     |     |     |     |
| Shannon_147785 |                                                                                                                         |     |     |     |     |     |
|                |                                                                                                                         |     |     |     |     |     |
| Hopsarin       | G I V S W G E G C A R K G Q I G R A S C R E R V                                                                         |     |     |     |     |     |
| Shannon_62829  | G I V S W G E G C A R K G K Y G V Y T K V S R F I P W I K K I M S L K                                                   |     |     |     |     |     |
| Shannon_117774 |                                                                                                                         |     |     |     |     |     |
| Shannon_195406 |                                                                                                                         |     |     |     |     |     |
| Shannon_80160  |                                                                                                                         |     |     |     |     |     |
| Shannon_25096  |                                                                                                                         |     |     |     |     |     |
| Shannon_44872  |                                                                                                                         |     |     |     |     |     |
| Shannon_147785 |                                                                                                                         |     |     |     |     |     |

**Figure S2.** Seven deduced protein sequences from the transcriptome after matching with fragments from MS/MS, which were then matched using a BLAST search in UniProt to the previously identified hopsarin (P83370). The domains are shaded as follows: signal peptide (red), propeptide (yellow), light chain (blue), activation peptide (grey) and heavy chain (green), with non-shaded areas indicating different residues, importantly residues 3 and 70 that differ to hopsarin. Regions of the deduced sequence where MS/MS protein fragments matched are in bold blue (light chain) and bold green (heavy chain).

## Tree

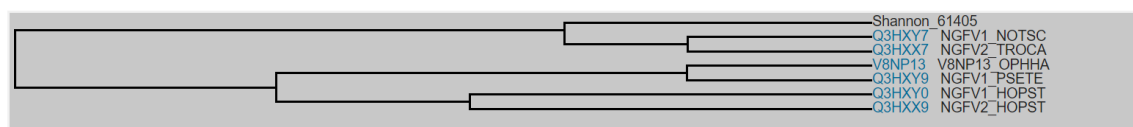

**Figure S3.** Tree diagram of the seven sequences for NGFs from Figure 10 using ALIGN in UniProt. This indicates that the new NGF-elapitoxin-Hs1 (transcript id: Shannon\_61405) we identified is most similar to two previously identified NGFs in the closely related species, *N. scutatus* (NGFV1\_NOTSC) and *T. carinatus* (NGFV2\_TROCA). The previously identified NGFs in *H. stephensii* venom (NGFV1\_HOPST and NGFV2\_HOPST), have sequences closer to *P. textilis* (NGFV1\_PSETE) and *O. hannah* (V8NP13\_OPHHA), species in a different clade and a different subfamily, respectively. .

The crude venom of *H. stephensii* (pooled from two individuals), was first subjected to sodium dodecyl sulfate polyacrylamide gel electrophoresis (SDS-PAGE) analysis (Figure S4). The electrophoretic venom profile was compared with an Asian elapid – the monocled cobra *Naja kaouthia*, and two other species of Australian elapids – Southern death adder *Acanthophis antarcticus* and the Papuan black snake *Pseudechis papuanus* (Figure S4). A remarkable feature of the venom profile of *H. stephensii* was the unusually high abundance of high molecular weight toxins in the mass range of 60 to 90kDa. This was calculated by densitometry to be 45% of the whole venom (Table S2).

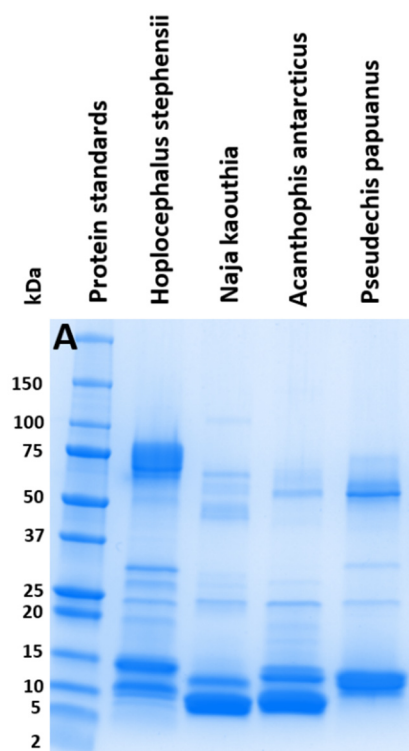

**Figure S4.** SDS-PAGE analysis of four elapid snake venoms shows the unusually high proportion of high molecular weight toxins (60 to 90kDa), in the venom of *Hoplocephalus stephensii* (pooled from two individuals), compared to elapid species with “typical” elapid 3FTx or PLA<sub>2</sub> (5 to 15kDa) dominant venoms; Monocled Cobra *Naja kaouthia*, Southern death adder *Acanthophis antarcticus*, and Papuan black snake *Pseudechis papuanus*.

**Table S2.** Densitometry of the whole venom of *Hoplocephalus stephensii* (taken from Figure S3), showing the high molecular weight toxins SVMP and LAAO make up 45% of the whole venom when fractionated electrophoretically.

| Densitometry of WV Pooled 2 Individuals |          |          |     |                       |
|-----------------------------------------|----------|----------|-----|-----------------------|
| Lane                                    | Band No. | Band %   |     |                       |
| 1                                       | 1        | 44.62928 | 45% | high molecular weight |
| 1                                       | 2        | 3.842845 |     |                       |
| 1                                       | 3        | 2.24096  |     |                       |
| 1                                       | 4        | 2.058681 |     |                       |
| 1                                       | 5        | 2.122584 |     |                       |
| 1                                       | 6        | 22.29095 |     |                       |
| 1                                       | 7        | 18.2846  |     |                       |
| 1                                       | 8        | 4.530104 |     |                       |
