# Supplementary material for: The Unusual Metalloprotease-Rich Venom Proteome of the Australian Elapid Snake Hoplocephalus stephensii
Source: Toxins (Basel). 2022 Apr 28;14(5):314. doi: 10.3390/toxins14050314 (PMC9147224; doi:10.3390/toxins14050314)
Supplement: Supplementary file 1 [file toxins-14-00314-s001.zip › Supplementary File S1.csv]

PEAK #	peak % of WV based on integration	band designation	band % of peak densitometry						protein family % of band MS1		Protein Family
Peak 1	4.2		100								3FTx
Peak 2	4.6		100								3FTx
Peak 3	1.4		100								3FTx
Peak 4	1.7	c	13.87
		b	55.07	0.017	0.93619						PLA2
		a	31		0.527						NP?
Peak 5	0.9	d	15.386673	0.009							PLA2
		c	24.963772
		b	39.616144		0.356545296						PLA2
		a	20.033411		0.180300699						NP?
Peak 6	0.7	c	21.6518	0.007
		b	66.446198		0.465123386						PLA2
		a	11.902002		0.083314014						NP?
Peak 7	4.3		83.5	3.59							PLA2
Peak 8	6	a	15.33								PLA2
		b	84.67								PLA2
Peak 9	3.2	a	46								PLA2
		b	54								PLA2
Peak 12	0.8		74.5	0.008	0.596	0.00596		1975000	69.05497825	0.41156767	NGF
								885040	30.94502175	0.18443233	PLA2
								2860040
Peak 13	0.5		82.9	0.005	0.4145	0.004145		913890	94.74260395	0.392708093	NGF
								50713	5.257396048	0.021791907	PLA2
								964603
Peak 14	7.6	a	27.7		0.076	2.1052	0.021	4330400	84.02728675	1.764573022	hopsarin
								302160	5.863126954	0.123125666	PLA2
								447460	8.682535038	0.182333236	CRiSP
								73544	1.42705126	0.029968076
								5153564
		b	18			1.368	0.01368	3984800	97.71590782	1.336753619	CRiSP
								47910	1.174856742	0.01607204
								45234	1.109235438	0.015174341	PLA2
								4077944
		c	54.3			4.1268
Peak 15	1.7	b	26.1		0.017	0.4437	0.004437	383340	50.60106419	0.224516922	CRiSP
								351830	46.44172905	0.206061952
								22403	2.957206764	0.013121126	PLA2
								757573
Peak 16	1.2				0.012			2288000	93.27582411	1.119309889	SVMP
								164940	6.724175887	0.080690111	SVMP
								2452940
Peak 18	10.1				0.101			1037900	21.2124123	2.142453642	SVMP				T_178176
								466130	9.526680551	0.962194736	keratin
								688360	14.06857706	1.420926283	SVMP				T_44374
								2700500	55.1923301	5.57442534					S_519
								4892890
Peak 19	18.9				0.189			12961	0.087773588	0.016589208					S_95465
								6518000	44.14074899	8.342601559	LAO				S_182847
								1610200	10.90448512	2.060947688	SVMP				T_125404
								5592700	37.8744963	7.1582798	SVMP				T_178176
								159870	1.082660562	0.204622846					S_14918
								472950	3.202879293	0.605344186	SVMP				T_114512
								218080	1.476866299	0.279127731	SVMP				O_18556
								181640	1.230089851	0.232486982	SVMP				T_114502
								14766401
Peak 20	15.5			0.155							SVMP				O_18619
Peak 20		a	19.7	3.0535	0.030535			6908700	75.84312033	2.315869679	SVMP				T_125404
								303280	3.329382016	0.10166268	SVMP				S_126128
								39148	0.429763411	0.013122826	SVMP				O_18556
								601600	6.604313574	0.201662715	SVMP				T_178176
								658220	7.225883113	0.220642341	LAO				S_182847
								598250	6.567537559	0.200539759	LAO				T_95357
								9109198
				0.155											O_18619
Peak 20		b	42	6.51	0.0651			5772600	57.93694261	3.771694964	SVMP				T_125404
								37601	0.377384017	0.0245677	SVMP				O_18556
								634860	6.371799083	0.41480412	SVMP				T_178176
								207530	2.082883571	0.13559572	SVMP				S_95465
								2101700	21.09380042	1.373206407	SVMP				O_10923
								1209300	12.1371903	0.790131088	SVMP				O_18546
								9963591
				0.155
Peak 20		c	38.3	5.9365	0.059365			217420	33.67151457	1.998909462	LAO				S_182847
								324890	50.31523488	2.986963919	SVMP				T_178176
								44890	6.952048059	0.412708333	SVMP				S_104731
								58509	9.061202492	0.537918286	SVMP				T_38189
								645709
	1.1			0.011
Peak 21		a		0.5918	0.005918			8474000	96.79560182	0.572836372	SVMP				S_158907
								280530	3.20439818	0.018963628	SVMP				S_103796
								8754530
				0.011
Peak 21		b		0.1463	0.003619
				0.011				1331900	87.44567883	0.316465912	SVMP				S_95465
Peak 21		c		0.3619	0.003619			142020	9.324300103	0.033744642	SVMP				T_44360
								49197	3.230021069	0.011689446	SVMP				S-158907
								1523117
